# Supplementary material
Source: publisher figshare collection journal article supplement (https://asha.figshare.com/ndownloader/files/35063443)
Supplement: Supplementary file 1 [file 35063443]

**Supplemental Material S1.** Characteristics of third-wave therapies.

| <b>Name</b>                                    | Mindfulness-based Cognitive Therapy (MBCT)                                                                                                                     | Mindfulness-based Stress Reduction (MBSR)                                                                                                                      | Acceptance and Commitment Therapy (ACT)                                                                                                                                                                                                                            | Dialectical Behaviour Therapy (DBT)                                                                                                                                               | Compassion-Focused Therapy (CFT)                                                                                                                                                       | Meta-cognitive Therapy (MT)                                                                                                                                           |
|------------------------------------------------|----------------------------------------------------------------------------------------------------------------------------------------------------------------|----------------------------------------------------------------------------------------------------------------------------------------------------------------|--------------------------------------------------------------------------------------------------------------------------------------------------------------------------------------------------------------------------------------------------------------------|-----------------------------------------------------------------------------------------------------------------------------------------------------------------------------------|----------------------------------------------------------------------------------------------------------------------------------------------------------------------------------------|-----------------------------------------------------------------------------------------------------------------------------------------------------------------------|
| <b>Key references</b>                          | Segal et al. (2002)                                                                                                                                            | Kabat-Zinn (1990)                                                                                                                                              | Hayes et al. (1999)                                                                                                                                                                                                                                                | Linehan (1993a,b)                                                                                                                                                                 | Gilbert (2009)                                                                                                                                                                         | Wells (2009)                                                                                                                                                          |
| <b>Goals of therapy</b>                        | To cultivate nonjudgmental, present-focused awareness of one's thoughts, emotions, and physical sensations, with an attitude of acceptance and self-compassion | To cultivate nonjudgmental, present-focused awareness of one's thoughts, emotions, and physical sensations, with an attitude of acceptance and self-compassion | To be more open to and accepting of one's internal experiences (e.g., thoughts, emotions, and physical sensations), to become more aware of one's internal experiences in the here-and-now, and to commit to doing things guided by what really matters to oneself | To help oneself engage in functional, meaningful behavior in the presence of intense emotions (e.g., by encouraging acceptance and tolerance of distressing internal experiences) | To foster a compassionate relationship with oneself and others, and to experience inner warmth, safeness and soothing through the development of self-compassion and compassion skills | To modify thoughts and beliefs about one's thinking processes rather than the content of one's thoughts, and to develop skills in attentional control and mindfulness |
| <b>Mode of delivery</b>                        | Group                                                                                                                                                          | Group                                                                                                                                                          | Individual or group                                                                                                                                                                                                                                                | Both individual and group                                                                                                                                                         | Individual or group                                                                                                                                                                    | Individual or group                                                                                                                                                   |
| <b>Who typically provides the therapy*</b>     | Psychologists, psychotherapists, CBT therapists, and counselors                                                                                                | Psychologists, psychotherapists, CBT therapists, and counselors                                                                                                | Psychologists, psychotherapists, CBT therapists, and counselors                                                                                                                                                                                                    | Psychologists, psychotherapists, CBT therapists, and counselors                                                                                                                   | Psychologists, psychotherapists, CBT therapists, and counselors                                                                                                                        | Psychologists, psychotherapists, CBT therapists, and counselors                                                                                                       |
| <b>Average number of sessions</b>              | 8 (with or without a 1-day retreat)                                                                                                                            | 8 (with or without a 1-day retreat)                                                                                                                            | 6–12                                                                                                                                                                                                                                                               | 6–12                                                                                                                                                                              | 4–6                                                                                                                                                                                    | 8–12                                                                                                                                                                  |
| <b>Average duration of each session (mins)</b> | 120                                                                                                                                                            | 120–150                                                                                                                                                        | 60                                                                                                                                                                                                                                                                 | 60                                                                                                                                                                                | 60–120                                                                                                                                                                                 | 60–90                                                                                                                                                                 |

*Note:* \*Although psychologists, psychotherapists, CBT therapists, and counselors may typically provide these therapies, audiologists who are trained in these interventions can also deliver them.

## References

- Gilbert, P. J. (2009). *The compassionate mind*. Constable & Robinson.
- Hayes, S. C., Strosahl, K. D., & Wilson, K. G. (1999). *Acceptance and commitment therapy: An experiential approach to behavior change*. Guilford Press.
- Kabat-Zinn, J. (1990). *Full catastrophe living: Using the wisdom of your body and mind to face stress, pain, and illness*. Dell Publishing.
- Linehan, M. M. (1993a). *Cognitive-behavioral treatment of borderline personality disorder*. Guilford Press.
- Linehan, M. M. (1993b). *Skills training manual for treating borderline personality disorder*. Guilford Press.
- Segal, Z. V., Williams, J. M. G., & Teasdale, J. D. (2002). *Mindfulness-based cognitive therapy for depression*. Guilford Press.
- Wells, A. (2009). *Metacognitive therapy for anxiety and depression*. Guilford Press.
